# Supplementary material for: Copper 5-sulfoisophthalato quasi-planar squares in coordination polymers modulated by alkaline-earth metals: a way to molecular squares?
Source: Royal Society of Chemistry journal article supplement (doi:10.1039/b801887a), 2008-01-01
Supplement: b801887a.pdf [file b801887a.pdf]

## Supporting Information

for

### Copper 5-Sulfoisophthalato Quasi-planar Squares in Coordination Polymers

#### Modulated by Alkaline-earth Metals: A Way to Molecular Squares?

Rong Cao<sup>\*,†</sup>, Jian Lü<sup>†,‡</sup>, Stuart R. Batten<sup>\* §</sup>

<sup>†</sup>*State Key Laboratory of Structural Chemistry, Fujian Institute of Research on the Structure of Matter, Chinese Academy of Sciences, Fujian, Fuzhou, 350002, P. R.*

*China; <sup>‡</sup>Graduate School, Chinese Academy of Sciences, Beijing, 100039, P. R. China;*

<sup>§</sup>*School of Chemistry, Monash University 3800, Australia*

**Fig. S1** Topological representation of the 3,6-connected 2-D net of complex **2a**.

**Fig. S2** Topological representation of the 3,6-connected 2-D net of complex **2b**.

**Fig. S3** A view of the hydrogen-bonded network of (a) **2a** and (b) **2b**, showing the hydrogen bonds in the interlamellar regions.

**Fig. S4** TG plots of complexes **2a** and **2b**.

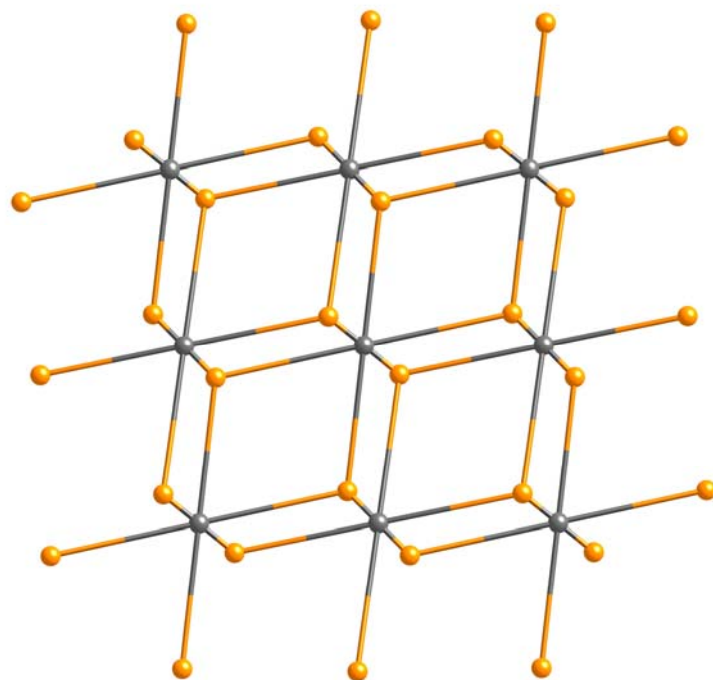

**Fig. S1**

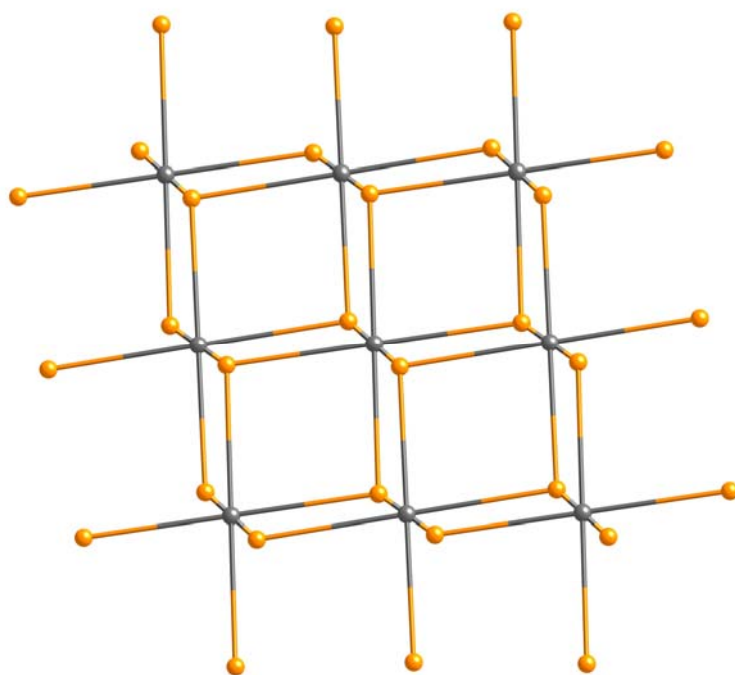

**Fig. S2**

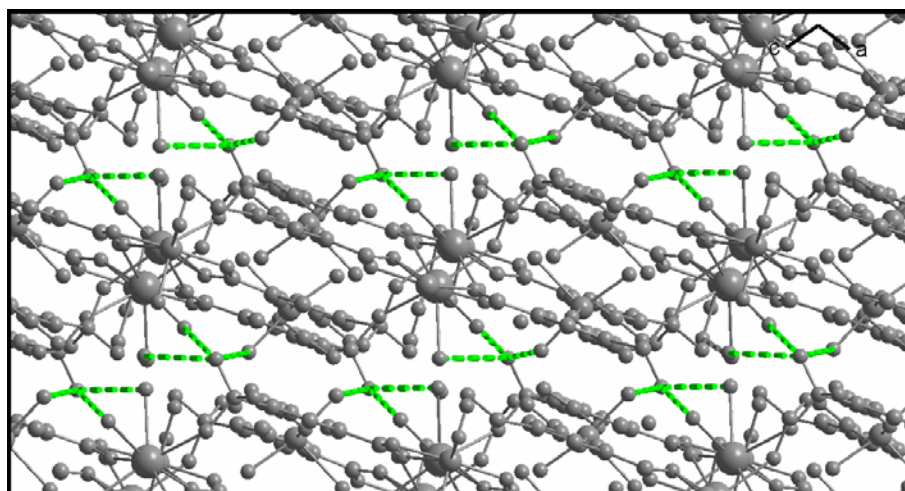

(a)

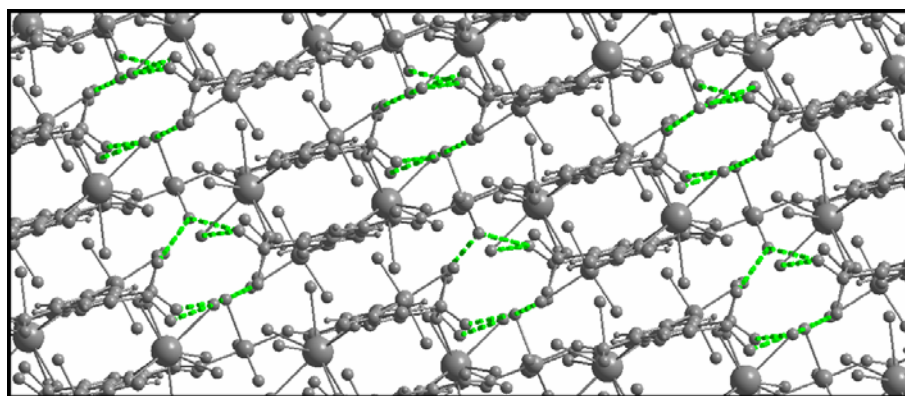

(b)

**Fig. S3**

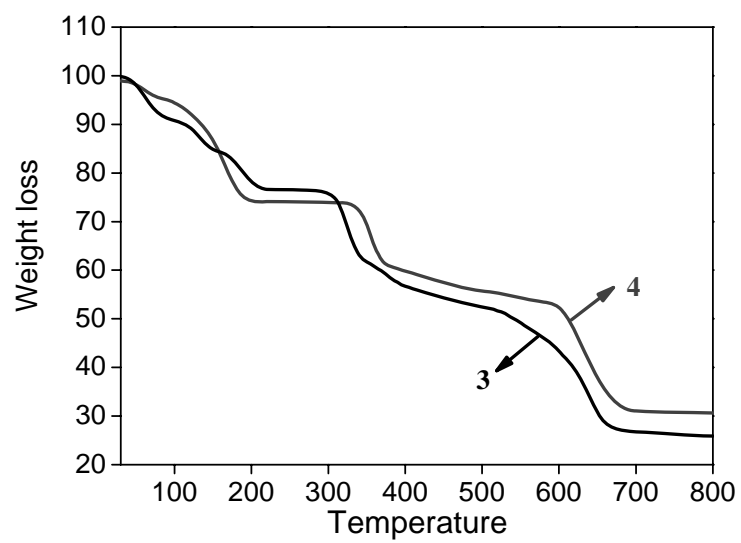

**Fig. S4**
